# Supplementary material
Source: PubMed Central journal article supplement (PMC3486104)
Supplement: JB.01110-12_zjb999092064so1.pdf [file JB.01110-12_zjb999092064so1.pdf]

# SUPPLEMENTAL MATERIAL

for

## Two systems for conditional gene expression in *Myxococcus xanthus* inducible by isopropyl- $\beta$ -D-thiogalactopyranoside or vanillate

### Supplementary Figures and Tables

FIG. S1. Schematic of several integrative plasmids for the IPTG- and vanillate-based gene expression systems.

FIG. S2. Multiple cloning sites (MCS A-G) of P<sub>IPTG</sub>- and P<sub>van</sub>-containing plasmids.

FIG. S3. Complete sequence for the P<sub>IPTG</sub> promoter.

FIG. S4. Strategy for generating strains with conditional expression of essential genes in *M. xanthus*.

FIG. S5. FtsZ depletion abolishes cell growth.

FIG. S6. Motility or sporulation is not impaired by IPTG or vanillate.

FIG. S7. Localization of FtsZ-YFP after induction with vanillate.

FIG. S8. DNA integration at the Mxan18\_19 chromosomal locus does not affect P<sub>van</sub>-*lacZ* reporter gene expression, aggregation, sporulation, or motility.

Table S1. DNA oligonucleotides used in this study

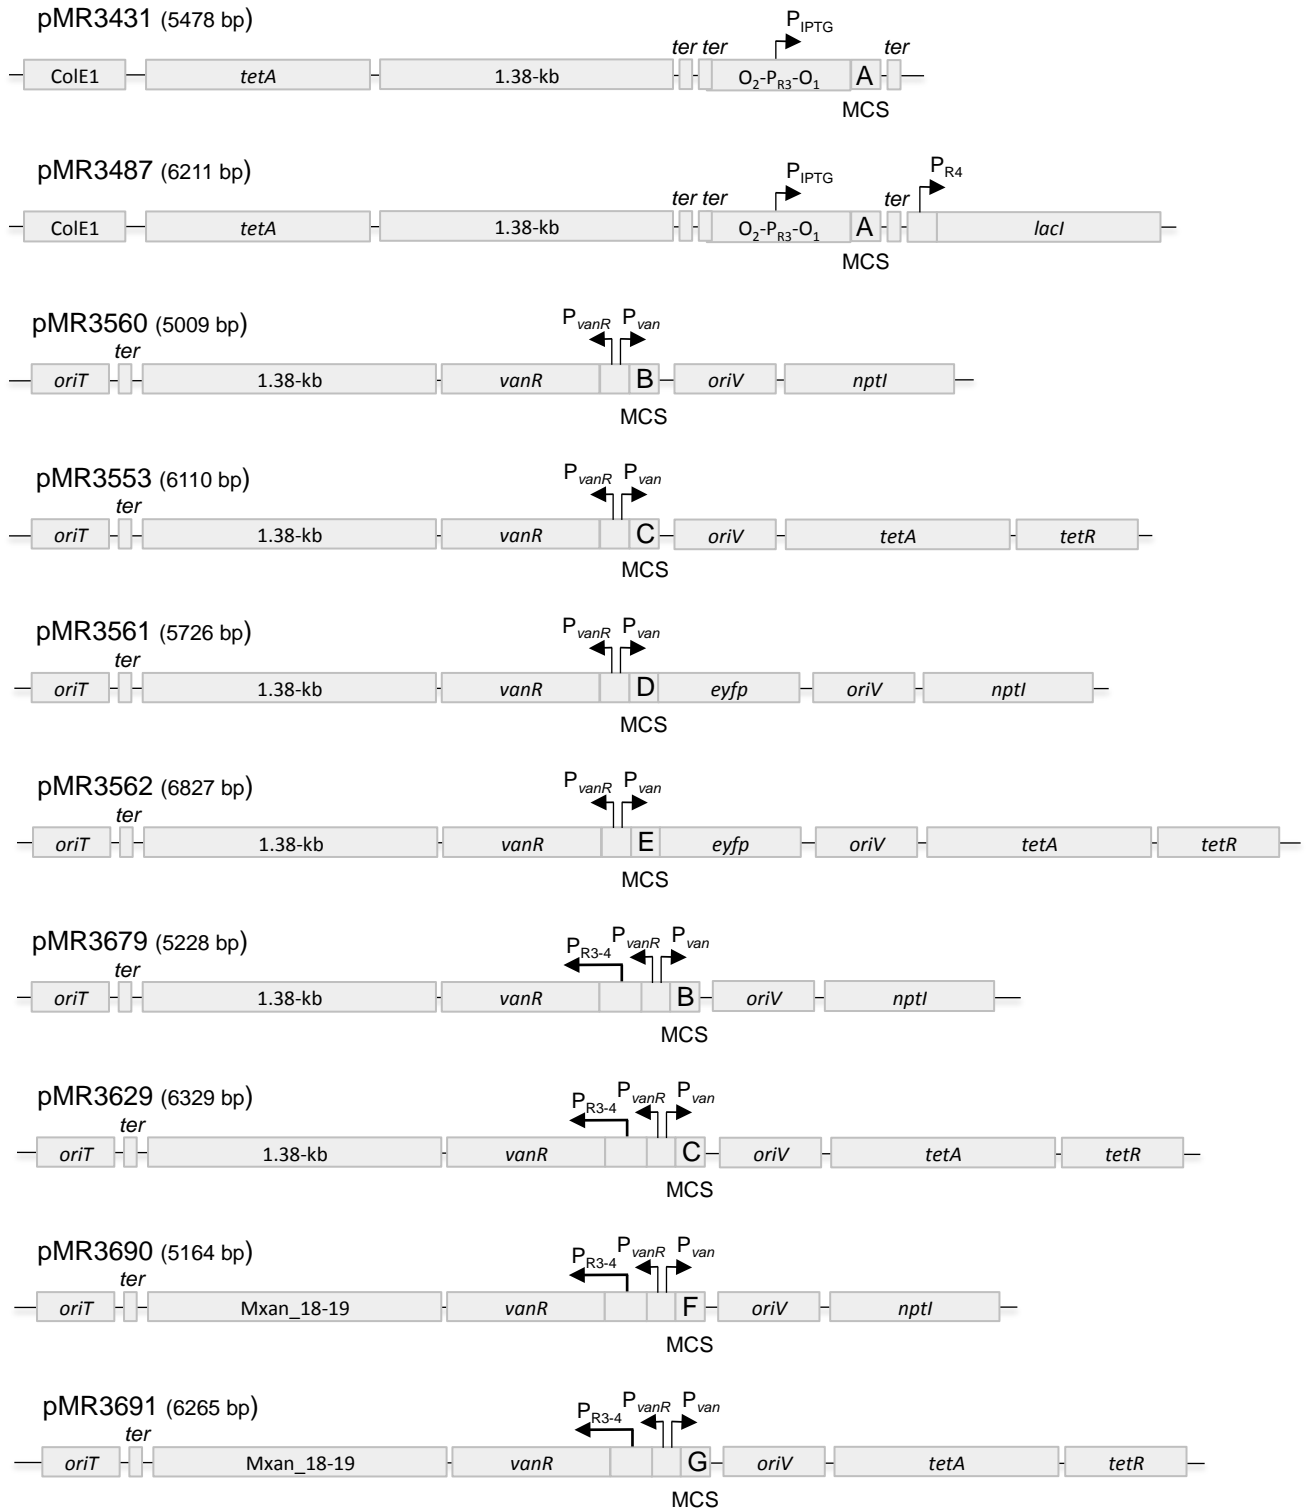

FIG. S1. Schematic of several integrative plasmids for the IPTG- and vanillate-based gene expression systems. Elements used are denoted as follows.  $P_{IPTG}$ : the IPTG-inducible promoter composed of the *rrnD*  $P_{R3}$  promoter flanked by two *lacO* operators ( $O_2$  and  $O_1$ );  $P_{R4}$ : the *rrnD* promoter;  $P_{van}$ : the vanillate-inducible promoter;  $P_{vanR}$ : the

natural promoter for constitutive *vanR* expression; P<sub>R3-4</sub>: P<sub>R3</sub> and P<sub>R4</sub> in tandem; *ter*: transcriptional terminator; *lacI*: gene for *E. coli* LacI repressor; *vanR*: *C. crescentus* VanR repressor gene; 1.38-kb and Mxan\_18-19: *M. xanthus* chromosomal DNA segments that allow plasmid integration into the chromosome at distinct sites (see text); ColE1, *oriV*: plasmid replication origins; *oriT*: origin of transfer; *tetA*: tetracycline efflux permease and *tetR*: TetR repressor (for Tc<sup>R</sup>); *nptI*: neomycin phosphotransferase I (for Km<sup>R</sup>); *eyfp*: enhanced yellow fluorescent protein; MCS, A-G: different multicloning sites (A to G; see Fig. S2 for details).

MCS A

RBS *XbaI* *SmaI* *KpnI*  
aat<sup>taaggaggc</sup>tctagagcatcccggtaccgagctc

MCS B

RBS *NdeI* *KpnI* *BglII* *EcoRI* *MluI* *NheI*  
cacgatg<sup>cgagga</sup>aacgcataatgctcgctgtacaagcctgcaggcgcttaattaatatgcatggtacccttaagatctcgagctccggagaattcgaaagttacgctaccggtgctagctgc

MCS C

RBS *NdeI* *KpnI* *BglII* *XhoI* *EcoRI* *MluI* *NheI*  
cacgatg<sup>cgagga</sup>aacgcataatgctcgctgtacaagcctgcaggcgcttaattaatatgcatggtacccttaagatctcgagctccggagaattcgaaagttacgctaccggtgctagctgc

MCS D

RBS *NdeI* *KpnI* *BglII* *EcoRI* *MluI* *fusion eyfp*  
cacgatg<sup>cgagga</sup>aacgcataatgctcgctgcaggcgcttaattaatatgcatggtacccttaagatctcgagctccggagaattcgaaagttacgctcaccggtcggccaccat<sup>ggtagcaag</sup>

MCS E

RBS *NdeI* *KpnI* *BglII* *XhoI* *EcoRI* *MluI* *fusion eyfp*  
cacgatg<sup>cgagga</sup>aacgcataatgctcgctgcaggcgcttaattaatatgcatggtacccttaagatctcgagctccggagaattcgaaagttacgctcaccggtcggccaccat<sup>ggtagcaag</sup>

MCS F

RBS *NdeI* *KpnI* *BglII* *SacI* *EcoRI* *MluI* *NheI*  
cacgatg<sup>cgagga</sup>aacgcataatgctcgctgtacaagcctgcaggcgcttaattaatatgcatggtacccttaagatctcgagctccggagaattcgaaagttacgctaccggtgctagctgc

MCS G

RBS *NdeI* *KpnI* *BglII* *XhoI* *SacI* *EcoRI* *MluI* *NheI*  
cacgatg<sup>cgagga</sup>aacgcataatgctcgctgtacaagcctgcaggcgcttaattaatatgcatggtacccttaagatctcgagctccggagaattcgaaagttacgctaccggtgctagctgc

FIG. S2. Multiple cloning sites (MCS A-G) of P<sub>IP<sub>2</sub>G</sub><sup>-</sup> and P<sub>van</sub>-containing plasmids. Shine-Dalgarno motifs or ribosomal binding sites (RBS), fusion *eyfp* tag, and unique restriction sites are indicated.

### *lacO*-P<sub>R3</sub>-*lacO* promoter or P<sub>IP<sub>3</sub></sub> promoter

```

ctgcaggactctctagcttgaggcatcaaataaaacgaaaggctcagtcgaaagactgggcctttcgttttatctgttgt
PstI
ttgtcgggtgaacgctctcctgagtaggacaaatccgccgctctagctaagcagaaggccatcctgacggatggccttttt
ter
gcgtttctacaaaactcttgtaacagtagagctgcctgcccgcgtttcgggtgatgaagatcttcccgatgattaattaatt
cagaacgctcggttgcccgcgggcttttttatgcagcaatggcaagaacggttgacgagggtaaatgtgagcactcaca
O2 operator
atcattttgcaaaagtgttgacagggagggcgccaaagcggtagaagccgcgccctaatgtgagcgggataacaatt
-35 PR3 -10 +1 O1 operator
aaggaggctctagagcatccccgggtaccgagctcgcttcgtaatcatggatcatagctggttccggtaaaacacctcca
RBS XbaI SmaI KpnI
agctgagtgcgggtatcagcttggaggtgcggtttatTTTTTcagccgatgacaaggtcggcatcaggtgtgacaaatac
ter
ggtatgctggctgtcataggtgacaaatccgggttttgcgcccgtttggctttttcacatgtctgattttgtataatcaa
caggcacggagccggaatctttcgctgaattc
EcoRI

```

- Restriction sites flanking the P<sub>IP<sub>3</sub></sub> promoter
- Transcriptional terminator (*ter*)
- lacO* operators (O<sub>2</sub> and O<sub>1</sub>)
- Ribosomal binding site (RBS)
- Restriction sites in the polylinker
- The third of the four tandem rRNA promoters present in the *rrnD* locus of *M. xanthus* (P<sub>R3</sub>)

FIG. S3. Complete sequence for the P<sub>IP<sub>3</sub></sub> promoter.

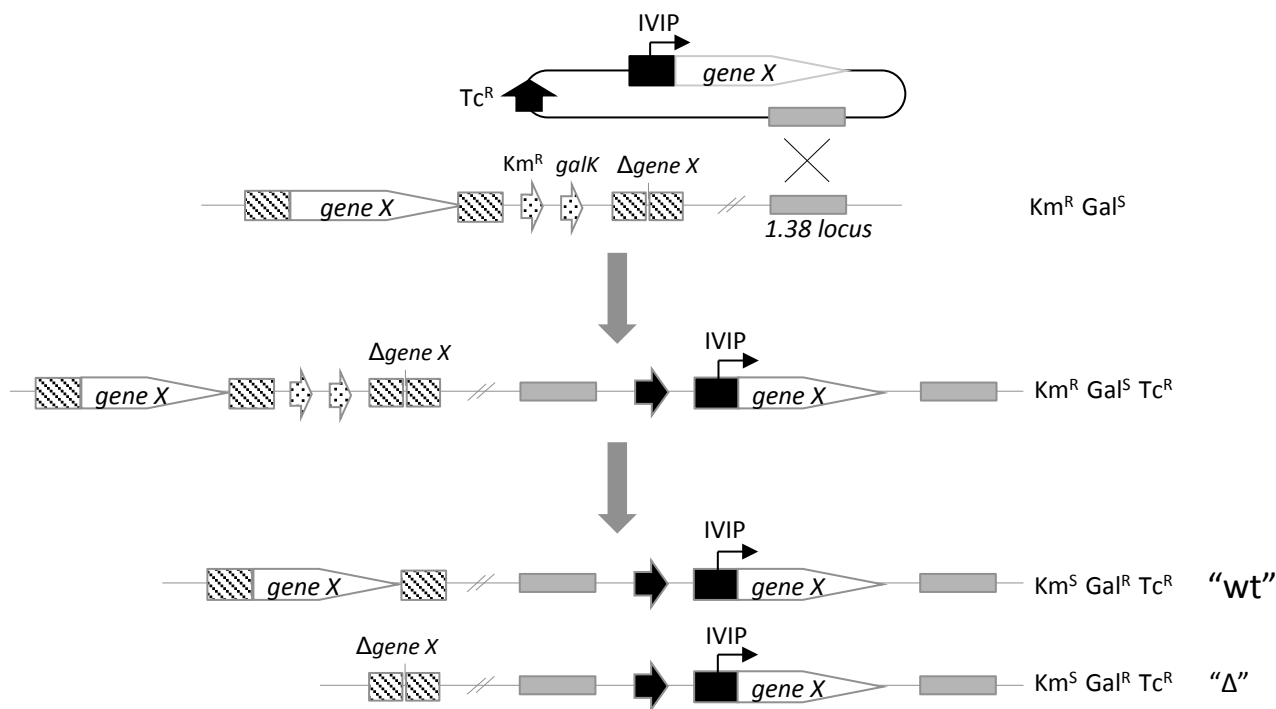

FIG. S4. Strategy for generating strains with conditional expression of essential genes in *M. xanthus*. The gene of interest is represented by *gene X* and the deleted allele by  $\Delta$ *gene X*. Other elements are as follows. IVIP: inducible P<sub>IPTG</sub> or P<sub>van</sub>; Tc<sup>R</sup>: tetracycline resistance; Km<sup>R</sup>: kanamycin resistance; Gal<sup>R</sup>/Gal<sup>S</sup> galactose resistance/sensitivity; 1.38-kb locus: chromosomal locus for plasmid integration via homologous recombination (solid gray boxes); striped boxes: sequences (~1 kb) upstream and downstream of the gene of interest in its natural genomic context. Strains thus generated have a copy of the gene expressed from the inducible promoter (P<sub>IPTG</sub> or P<sub>van</sub>) and are denoted "wt" or "Δ" depending on whether they have the wild-type or the deleted allele at the native locus.

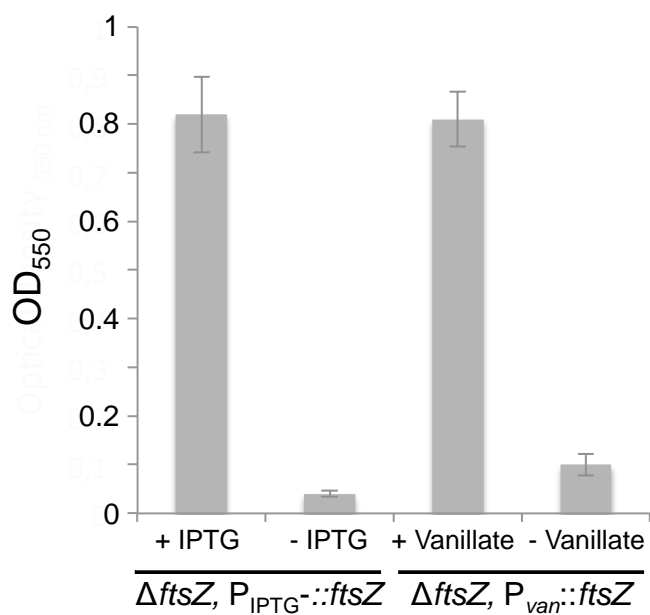

FIG S5. FtsZ depletion abolishes cell growth. Cell densities ( $OD_{550}$ ) for cultures of strains with a single copy of *ftsZ* under the control of the IPTG- or the vanillate-inducible promoter (strains MR2196 and MR1982, respectively), in the presence and in the absence of the appropriate inducer. A starter culture grown in the presence of inducer to an  $OD_{550}$  of 1 was diluted to 0.1 in fresh medium with or without inducer and grown for 24 hours. Cells were then diluted to  $OD_{550}$  of 0.1 and grown with or without inducer for a further 24 hours followed by  $OD_{550}$  measurement, shown as the mean and standard deviation of three independent measurements.

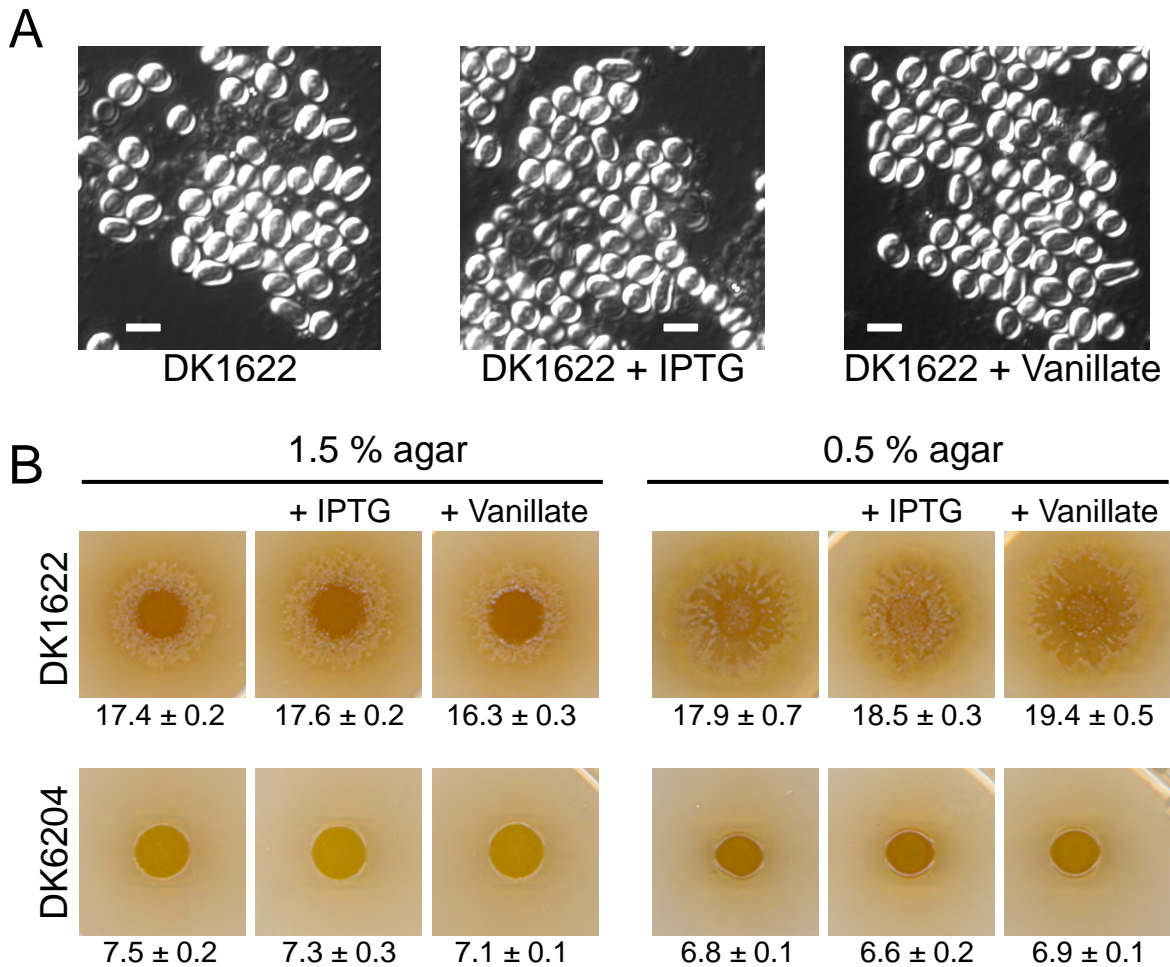

FIG. S6. Motility or sporulation is not impaired by IPTG or vanillate. (A) DIC microscopy images of spores from DK1622 fruiting bodies developed on TPM plates in the absence or presence of 1 mM IPTG or 0.5 mM vanillate. Fruiting bodies were scraped from the plates after 6 days and treated with sonication prior to microscopical observation. Note the round morphological shape that is characteristic of myxospores. Scale bars, 5  $\mu$ m. (B) Colony spreading motility assays for wild type DK1622 and for the nonmotile A<sup>-</sup>S<sup>-</sup> mutant strain DK6204 on 1.5% (for A motility) or 0.5% (for S motility) CTT agar plates in the absence or presence of 1 mM IPTG or 0.5 mM vanillate. Images were taken 5 days after DK1622 and DK6204 cultures were spotted on the plates. Mean colony diameters and the corresponding standard deviation from four independent spots (each 6 mm in diameter initially) of each strain and condition are indicated below each spot.



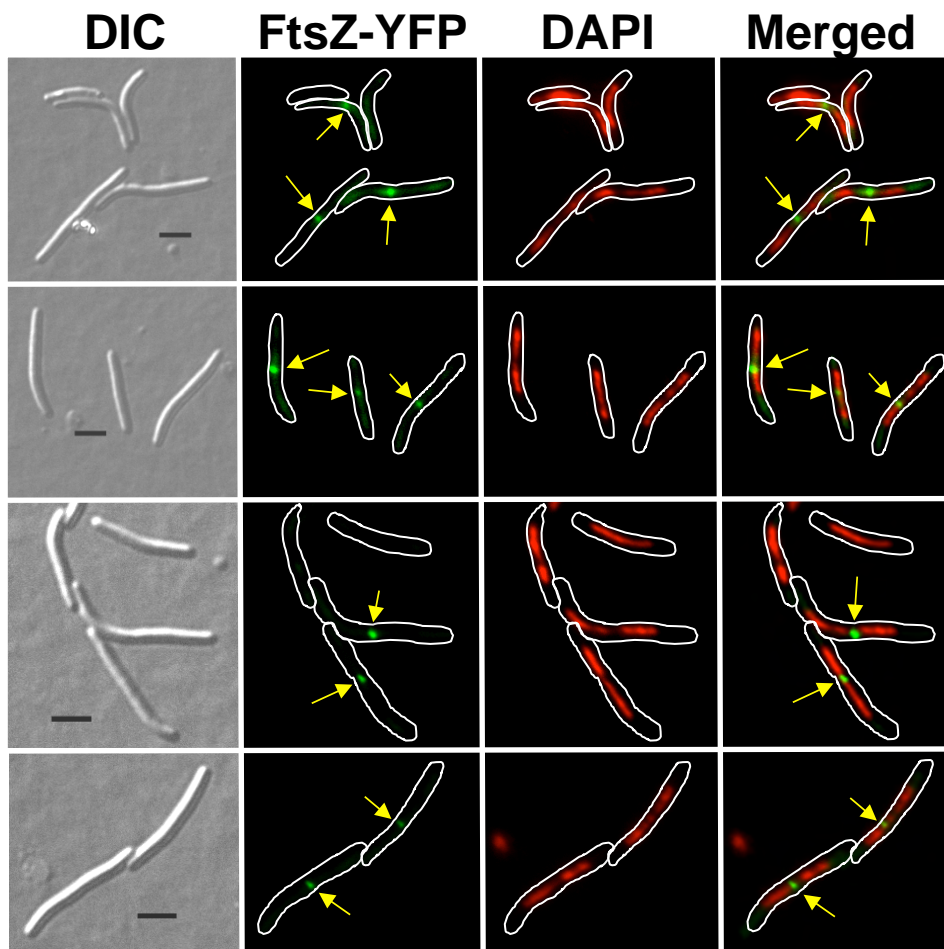

FIG S7. Localization of FtsZ-YFP after induction with vanillate. In each row, panels from left to right correspond to images obtained by DIC, FtsZ-YFP fluorescence (green), DAPI fluorescence (red), and a merged image of the last two (green and red) for strain MR2479 after 1 hour of induction with 0.5 mM vanillate. For the fluorescence images the cell outline is shown drawn with a white line. Scale bars, 5  $\mu$ m. Yellow arrows point FtsZ-YFP foci.

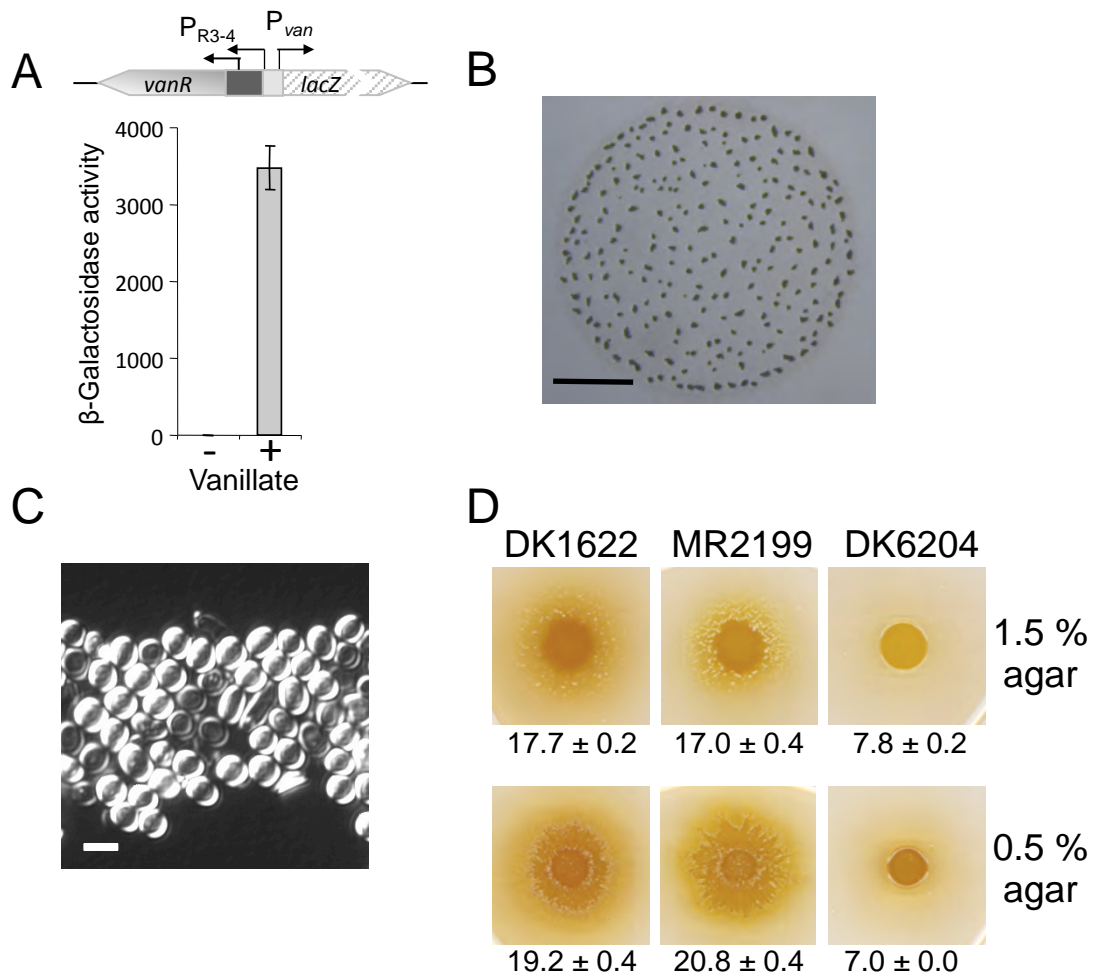

FIG S8. DNA integration at the Mxan18\_19 chromosomal locus does not affect  $P_{van}$ -*lacZ* reporter gene expression, aggregation, sporulation, or motility. (A) Expression of the  $P_{van}$ ::*lacZ* reporter gene for strain MR2491 (with  $P_{van}$ ::*lacZ* integrated at the Mxan18\_19 chromosomal locus and the VanR repressor expressed from  $P_{R3-4}$ ) after a 15- to 20- hour growth in the absence or in the presence of 0.5 mM vanillate. Mean values and standard deviation of the mean are from three independent experiments. Fruiting body aggregates (B) and DIC image of spores (C) for strain MR2199, bearing the  $P_{van}$ ::*ftsZ-yfp* construct at the Mxan18\_19 locus, 6 days after triggering starvation-induced development on TPM agar. Scale bars, 2 mm (B) and 5  $\mu$ m (C). (D) Colony spreading assays for A motility (top panels, 1.5 % agar) and S motility (bottom panels, 0.5% agar) for MR2199 and, as controls, for the wild-type strain DK1622 and the A<sup>-</sup>S<sup>-</sup> nonmotile mutant strain DK6204. Images were captured 5 days after cultures were spotted on the indicated CTT-agar plates. Mean colony diameters and the corresponding standard deviation (estimated as in Fig. S6B from six independent spots, each 6 mm initial diameter) are shown below each spot.

## SUPPLEMENTARY TABLES

**Table S1.** DNA oligonucleotides used in this study.

| Name            | Site         | Sequence 5'-3'(restriction site underlined)   | Reference  |
|-----------------|--------------|-----------------------------------------------|------------|
| 1_FtsZ.for      | <i>NdeI</i>  | agaggacc <u>catatgg</u> accagttcgatca         | This study |
| 2_FtsZ.rev      | <i>KpnI</i>  | ttttggtacc <u>cggcagttcc</u> gtctggcct        | This study |
| 9_LacZ.for      | <i>NdeI</i>  | tctagaaggaaacac <u>catatg</u> accatgatta      | This study |
| 20_rRNA-1.for   | <i>NcoI</i>  | aaaaa <u>ccatgggg</u> acgagtcgagggagtca       | This study |
| 21_rRNA-3.rev   | <i>NcoI</i>  | aaaaa <u>ccatggacc</u> gcctccccgtcttcttc      | This study |
| 33_Ori.for      | <i>NdeI</i>  | gctgtcggggc <u>acatatgg</u> cgccagacgat       | This study |
| 34_Ori.rev      | <i>XbaI</i>  | gcatgcgggaag <u>tctagac</u> gccgcgcccgcac     | This study |
| cdnL-BamHI      | <i>BamHI</i> | aaaggatc <u>cctcagg</u> ccagattgaagatctt      | This study |
| cdnL-NdeI       | <i>NdeI</i>  | aaaaaaaa <u>acatatg</u> cagaccagcttcaag       | This study |
| ftsZ-EcoRI      | <i>EcoRI</i> | aaaagaatt <u>cttac</u> ggcagttccgtctggccc     | This study |
| ftsZ-NdeI       | <i>NdeI</i>  | aaaaaaaa <u>acatatg</u> gaccagttcgatcagaacaag | This study |
| lac274-BamHI    | <i>BamHI</i> | aaaaggat <u>ccagg</u> cgaaagattccggctccg      | This study |
| lacI_NdeI_DR111 | <i>NdeI</i>  | aaa <u>acatatg</u> tcactgcccgtttccagtc        | This study |
| lacI_XhoI_DR111 | <i>XhoI</i>  | aaa <u>actcg</u> aggtgaaaccagtaacgttatac      | This study |
| lacZSEQ2        | ---          | acggttaacgcctcgaatc                           | This study |
| lacZ-XbaI       | <i>XbaI</i>  | aaat <u>ctaga</u> atcacacaggaaacagctatg       | This study |
| prRNA3-XhoI     | <i>XhoI</i>  | aaa <u>actcg</u> aggcctccccgtcttcttctgcccgg   | This study |
| prRNA5-RI       | <i>EcoRI</i> | aaagaatt <u>ccgga</u> agccagcaggacggcg        | This study |
